# Supplementary material
Source: publisher figshare collection journal article supplement (https://asha.figshare.com/ndownloader/files/22735166)

## Supplemental Material S1. Technical details on integrated weighted intelligibility response for multiword utterances.

Let  $L_i$  be the length of the longest utterance(s) achieved by child  $i$ , so that  $2 \leq L_i \leq 7$  for each child. Let  $R_{ik}$  be the intelligibility score (i.e., the average across the two final listeners) for utterances of length  $k$  for child  $i$ , where  $R_{ik}$  is missing for  $k > L_i$ . Finally, let  $X_i$  be the child's age.

**Problem.** The challenge is that we do not want to analyze and report separately the intelligibility values  $R_{ik}$  for each utterance length  $k$  because (a) it would result in too many results, each with relatively weak information, getting weaker for larger  $k$ , and (b) the non-missing intelligibility values for larger  $k$  are only available for the children with higher levels of development.

**Imputation and averaging.** Here we generate a weighted average of utterance length-specific intelligibility values after imputing the missing values.

1. Using only the data for which  $L_i = 7$ , fit a regression model for score  $R_{i7}$  as a linear function of  $R_{i2}, \dots, R_{i6}$ . Save the regression coefficients.
2. Sequentially fit 4 more regression models (for  $k = 3, 4, 5, 6$ ) for  $R_{ik}$  as functions of  $R_{i2}, \dots, R_{i,k-1}, L_i$ , noting the inclusion of  $L_i$  in this model). For each model fit, only use the data for which for  $L_i \geq k$ . Save the regression coefficients for each model.
3. Using the models, for all missing values of  $R_{ik}$  (i.e., when  $L_i > k$ ), predict (impute)  $R_{ik}$  with the regression models. Call the new values  $\tilde{R}_{ik}$ . (These are the true  $R_{ik}$ 's when available or the imputed ones when not). Start from  $k = 3$  and work the way up so in each case  $k$ , either true or imputed values  $\tilde{R}_{ik}$  are used to predict the next level up.
4. Now, using a 2 df natural spline in age ( $X_i$ ), fit an ordinal logistic regression model for  $L_i$ . From this model, obtain, for  $k = 3, 4, 5, 6, 7$ , probability  $\tilde{\pi}_{ik}$  as a function of  $X_i$  that  $L_i \geq k$ . These probabilities will be decreasing in  $k$ . Note that  $\tilde{\pi}_{i2} = 1$ . Now normalize these values by computing  $\pi_{ik} = \frac{\tilde{\pi}_{ik}}{\sum_{k'=2}^7 \tilde{\pi}_{ik'}}$  so that they sum to 1.
5. Finally compute a weighted average  $Y_i$  of  $R_{i2}, \dots, R_{i7}$  using weights  $\pi_{i2}, \dots, \pi_{i7}$ . Call this weighted average  $\tilde{R}_i$ . These values serve as our *integrated weighted intelligibility response* for multiword utterances.

**Discussion.** Our approach is very algorithmic; further methodological investigation would fully specify a statistical model for latent intelligibility which would (a) give rise to the observed (manifest)  $L_i$  values as well as to the values of the observed instances of  $R_{ik}$ .

### Coefficients used for imputation (1, 2).

| <i>Outcome</i> | <i>Predictor</i>       | <i>Estimate</i> | <i>SE</i> | <i>t</i> | <i>p</i> | <i>N</i> | <i>Adj. R<sup>2</sup></i> |
|----------------|------------------------|-----------------|-----------|----------|----------|----------|---------------------------|
| 3-wd           | (Intercept)            | −.07            | .04       | −1.70    | .091     | 162      | .70                       |
|                | 1-wd                   | .42             | .10       | 4.27     | < .001   |          |                           |
|                | 2-wd                   | .45             | .07       | 6.69     | < .001   |          |                           |
|                | Length of longest utt. | .03             | .01       | 4.04     | < .001   |          |                           |
| 4-wd           | (Intercept)            | −.13            | .07       | −1.79    | .077     | 102      | .58                       |
|                | 1-wd                   | .45             | .14       | 3.28     | .001     |          |                           |
|                | 2-wd                   | .21             | .11       | 1.88     | .063     |          |                           |
|                | 3-wd                   | .36             | .10       | 3.46     | < .001   |          |                           |
|                | Length of longest utt. | .02             | .01       | 1.59     | .115     |          |                           |
| 5-wd           | (Intercept)            | −.15            | .14       | −1.04    | .304     | 47       | .61                       |
|                | 1-wd                   | .06             | .21       | 0.27     | .786     |          |                           |
|                | 2-wd                   | .33             | .15       | 2.25     | .030     |          |                           |
|                | 3-wd                   | .20             | .16       | 1.25     | .219     |          |                           |
|                | 4-wd                   | .29             | .13       | 2.26     | .029     |          |                           |
|                | Length of longest utt. | .03             | .02       | 1.64     | .108     |          |                           |
|                |                        |                 |           |          |          |          |                           |
| 6-wd           | (Intercept)            | −.13            | .35       | −0.37    | .716     | 30       | .49                       |
|                | 1-wd                   | .24             | .24       | 1.01     | .322     |          |                           |
|                | 2-wd                   | .04             | .23       | 0.17     | .870     |          |                           |
|                | 3-wd                   | .33             | .27       | 1.23     | .232     |          |                           |
|                | 4-wd                   | .07             | .18       | 0.41     | .687     |          |                           |
|                | 5-wd                   | .39             | .22       | 1.79     | .086     |          |                           |
|                | Length of longest utt. | .01             | .05       | 0.24     | .810     |          |                           |
|                |                        |                 |           |          |          |          |                           |
| 7-wd           | (Intercept)            | .09             | .14       | 0.60     | .555     | 24       | .70                       |
|                | 1-wd                   | .24             | .20       | 1.18     | .253     |          |                           |
|                | 2-wd                   | −.06            | .19       | −0.34    | .741     |          |                           |
|                | 3-wd                   | −.35            | .25       | −1.40    | .180     |          |                           |
|                | 4-wd                   | .19             | .14       | 1.30     | .210     |          |                           |
|                | 5-wd                   | .15             | .19       | 0.78     | .445     |          |                           |
|                | 6-wd                   | .71             | .17       | 4.10     | < .001   |          |                           |
|                |                        |                 |           |          |          |          |                           |

**Imputation results (3).** The following figure shows the intelligibility scores for each utterance length (panels) by length of longest utterance (x axis). The blue triangles are observed and gold circles are imputed.

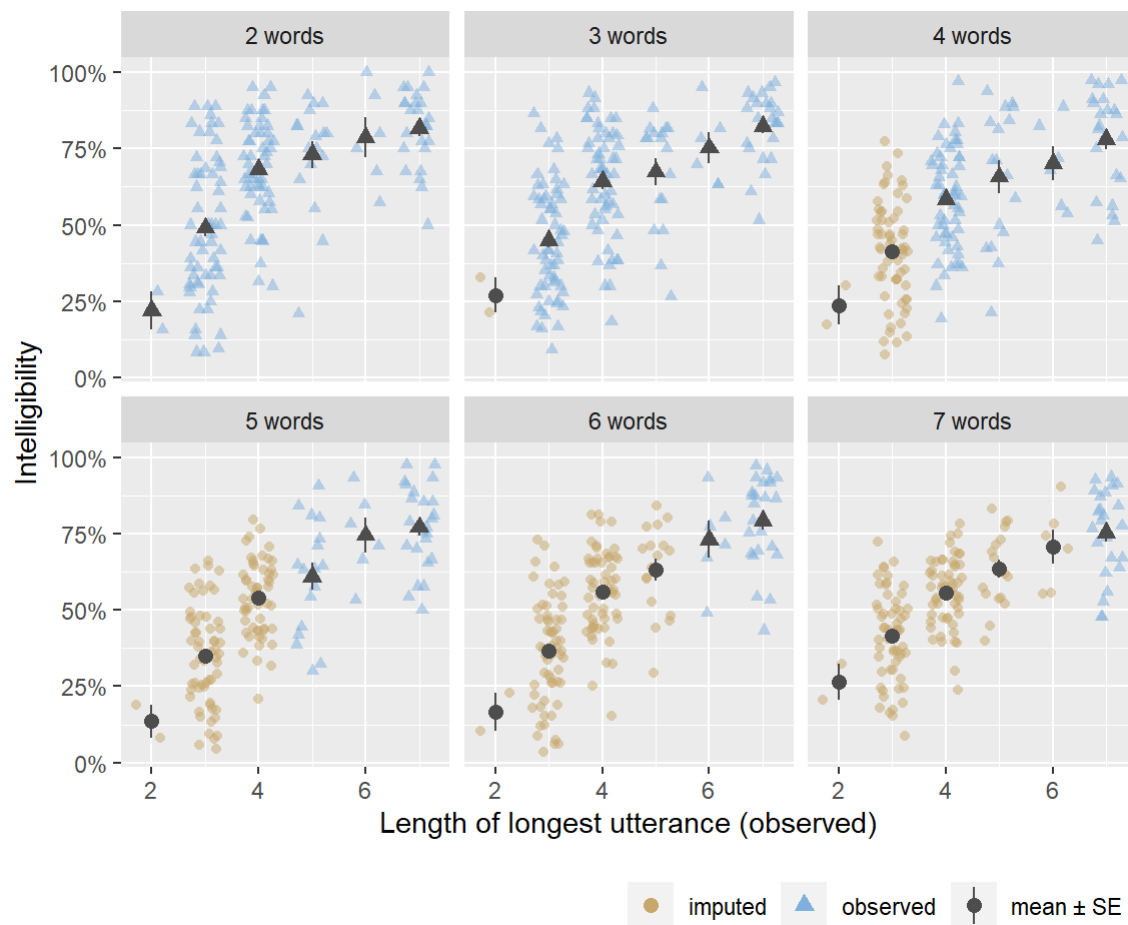

**Weighting of utterance lengths by age (4).** The following figure shows the probability of reaching each utterance length as a function of age (left). These probabilities were normalized and used as weights for computing the overall multiword intelligibility average (right). Thus, at 30 months, over 90% of the weighting comes from the 2- and 3-word utterances but by 47 months, 40% of the weighting comes from 2- and 3-word utterances.

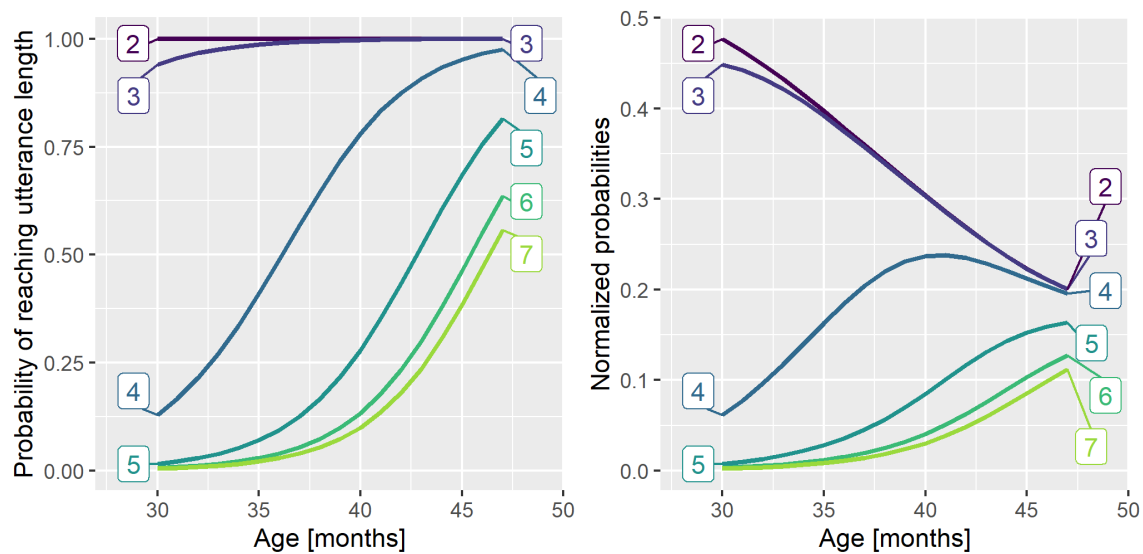

**Computing the final weighted average (5).** The following figure compares multiword intelligibility scores from observed scores versus scores with imputation and weighting. The average intelligibility as a function of age was unchanged by the procedure and differences at the child-level were small. We interpret the similarity here as encouraging: The goal of this procedure was provide a coherent way to handle missing data, not dramatically change the results.

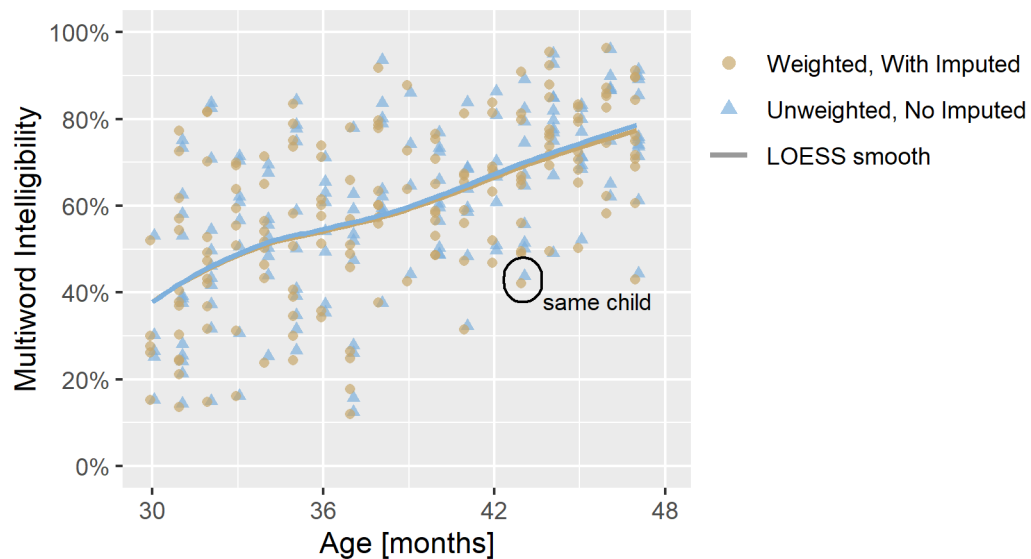

Supplement: Supplementary file 1 [file 22735166]
